# Supplementary material
Source: PubMed Central journal article supplement (PMC2814552)
Supplement: jc.2008-1064_1.pdf [file jc.2008-1064_1.pdf]

## 08-1064: CITED2 and PBX1 in human adrenal development and disease

### Supplemental Data: Clinical Characteristics

#### A. London, UK – CITED2 & PBX1 screened (n=36)

|                                                                                                                             | <b>46,XY</b><br>(n=31) | <b>46,XX</b><br>(n=5) |
|-----------------------------------------------------------------------------------------------------------------------------|------------------------|-----------------------|
| <b>Gonadal abnormalities</b><br>e.g., microphallus, mild hypospadias, ambiguous genitalia and complete underandrogenization | 13                     | -                     |
| <b>Cardiac defects</b><br>e.g., atrial septal defects, outflow tract anomalies                                              | 3                      | -                     |
| <b>IUGR</b>                                                                                                                 | 5                      | -                     |
| <b>Skeletal / IMAGE</b><br>IUGR, Metaphyseal Dysplasia, Adrenal Hypoplasia Congenita and Genital Anomalies                  | 5                      | 1                     |
| <b>Renal abnormalities</b><br>e.g., glomerulosclerosis                                                                      | 2                      | -                     |

Other features include brain abnormalities (1) and possible impaired glucose tolerance (1).

Number of patients previously screened for other adrenal candidate genes: NR5A1 (SF-1) = 35; NR0B1 (DAX1) = 35; StAR = 15; CYP11A1 = 16; MC2R (ACTHR) = 15; ACD = 5.

#### B. Dresden, Germany – PBX1 screened (n=20)

|                                                                                                            | <b>46,XY</b><br>(n=13) | <b>46,XX</b><br>(n=7) |
|------------------------------------------------------------------------------------------------------------|------------------------|-----------------------|
| <b>Alacrima</b>                                                                                            | 5                      | 1                     |
| <b>Achalasia</b>                                                                                           | 3                      | 3                     |
| <b>Neurological abnormalities</b><br>e.g., developmental delay, ataxia, epilepsy, hypotonia, nerve palsies | 3                      | 5                     |
| <b>Muscle weakness</b>                                                                                     | 1                      | 2                     |
| <b>Hypogonadism</b>                                                                                        | 1                      | -                     |

Other features include failure to thrive (2), diarrhea (2), respiratory infections / insufficiency (2), pancreatitis (1), cholelithiasis (1).

Number of patients previously screened for other adrenal candidate genes: NR0B1 (DAX1) = 2; MC2R (ACTHR) = 9; AAAS = 14.

#### C. Lyon, France – CITED2 screened (n=15)

|                                                                | <b>46,XY</b><br>(n=8) | <b>46,XX</b><br>(n=7) |
|----------------------------------------------------------------|-----------------------|-----------------------|
| <b>Deafness</b>                                                | -                     | 1                     |
| <b>IUGR / preterm</b>                                          | -                     | 1                     |
| <b>Neurological abnormalities</b><br>e.g., developmental delay | 1                     | -                     |

Number of patients previously screened for other adrenal candidate genes: NR0B1 (DAX1) = 8 (males); MC2R (ACTHR) = 15; NR5A1 (SF-1) = 6; StAR = 5, CYP11A1 = 4.
